# Supplementary material for: Early Sucralfate Administration Improves Prognosis in Sepsis: A Propensity Score Matched Cohort Study
Source: Research Square preprint supplement (doi:10.21203/rs.3.rs-7775251/v1), 2025-11-21
Supplement: Supplementary file 1 [file 7f1ceec6c8419e46b9beacb3.docx]

**Supplementary material**

**Title:**

Early Sucralfate Administration Improves Prognosis in Sepsis: A Propensity Score Matched Cohort Study.

**1. sFig.1: Visualization of missing data in variables of interest in MIMIC-IV database.**


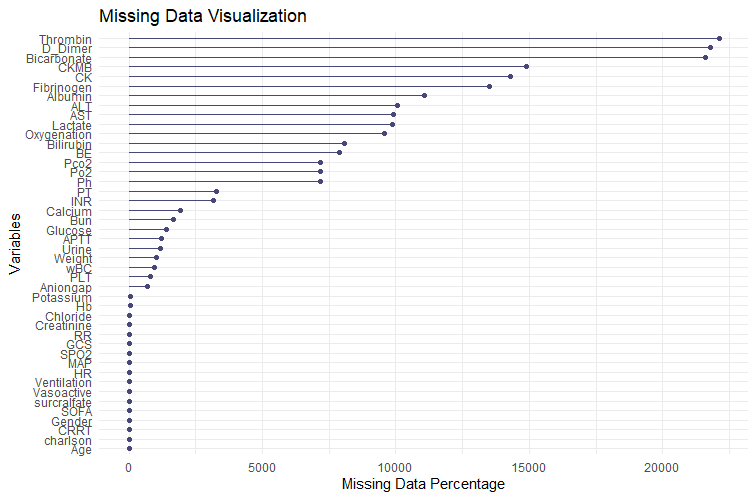


**sTable.1: Baseline characteristics of the original cohort**

| **Variables** | **n=22155** |
| --- | --- |
| ICU mortality (%) |  |
| NO | 19637 (88.6) |
| Yes | 2518 (11.4) |
| Hospital mortality (%) |  |
| NO | 18528 (83.6) |
| Yes | 3627 (16.4) |
| length of hospital stay (mean (SD)) | 12.39 (13.41) |
| length of ICU stay (mean (SD)) | 126.53 (161.85) |
| Ventilation (%) |  |
| NO | 12640 (57.1) |
| Yes | 9515 (42.9) |
| Vasoactive (%) |  |
| NO | 11016 (49.7) |
| Yes | 11139 (50.3) |
| SOFA (mean (SD)) | 6.17 (3.48) |
| CRRT (%) |  |
| NO | 20661 (93.3) |
| Yes | 1494 ( 6.7) |
| BE (mean (SD)) | -1.60 (3.77) |
| Oxygenation (mean (SD)) | 265.28 (107.30) |
| Pco2 (mean (SD)) | 41.47 (10.00) |
| Po2 (mean (SD)) | 180.35 (84.61) |
| Ph (mean (SD)) | 7.36 (0.08) |
| Lactate (mean (SD)) | 2.02 (0.95) |
| Bilirubin (mean (SD)) | 2.16 (4.75) |
| AST (mean (SD)) | 58.45 (50.46) |
| ALT (mean (SD)) | 36.97 (31.35) |
| APTT (mean (SD)) | 38.18 (18.28) |
| PT (mean (SD)) | 14.58 (2.61) |
| INR (mean (SD)) | 1.33 (0.25) |
| Potassium (mean (SD)) | 4.29 (0.64) |
| Creatinine (mean (SD)) | 1.57 (1.56) |
| Chloride (mean (SD)) | 104.02 (6.44) |
| Calcium (mean (SD)) | 8.24 (0.80) |
| Bun (mean (SD)) | 23.90 (13.83) |
| Aniongap (mean (SD)) | 14.11 (3.49) |
| Albumin (mean (SD)) | 3.11 (0.67) |
| wBC (mean (SD)) | 12.35 (5.23) |
| PLT (mean (SD)) | 185.15 (84.01) |
| Hb (mean (SD)) | 10.61 (2.05) |
| Urine (mean (SD)) | 1632.53 (987.33) |
| Glucose (mean (SD)) | 136.10 (33.57) |
| SPO2 (mean (SD)) | 96.97 (2.18) |
| RR (mean (SD)) | 19.80 (4.15) |
| MAP (mean (SD)) | 76.64 (9.86) |
| HR (mean (SD)) | 87.14 (16.25) |
| GCS (mean (SD)) | 13.17 (3.19) |
| Weight (mean (SD)) | 80.39 (19.74) |
| Gender (%) |  |
| F | 9276 (41.9) |
| M | 12879 (58.1) |
| Age (mean (SD)) | 64.91 (16.26) |
| surcralfate (%) |  |
| NO | 21737 (98.1) |
| Yes | 418 ( 1.9) |
| PPI (%) |  |
| NO | 13057 (58.9) |
| Yes | 9098 (41.1) |
| charlson (mean (SD)) | 5.18 (2.98) |

**sTable.2: Baseline characteristics of the original cohort were stratified by sucralfate use.**

| **Variables** | **NO-Sucralfate** | **Sucralfate** | **P Value** |
| --- | --- | --- | --- |
|
| 21737 | 418 |
| ICU mortality |  |  | <0.001 |
| NO | 19239 ( 88.5) | 398 ( 95.2) |  |
| YES | 2498 ( 11.5) | 20 ( 4.8) |  |
| Hospital mortality |  |  | <0.001 |
| NO | 18148 ( 83.5) | 380 ( 90.9) |  |
| YES | 3589 ( 16.5) | 38 ( 9.1) |  |
| Length of hospital stay | 12.40 (13.40) | 11.71 (14.05) | 0.3 |
| Length of ICU stay | 5.29(6.77) | 4.12 (5.08) | <0.001 |
| Ventilation Using (%) |  |  | 0.001 |
| NO | 12368 ( 56.9) | 272 ( 65.1) |  |
| YES | 9369 ( 43.1) | 146 ( 34.9) |  |
| Vasoactive Using (%) |  |  | <0.001 |
| NO | 10751 ( 49.5) | 265 ( 63.4) |  |
| YES | 10986 ( 50.5) | 153 ( 36.6) |  |
| PPI Using(%) |  |  | <0.001 |
| NO | 13000(59.8) | 57(13.6) |  |
| YES | 8737(40.2) | 361(86.4) |  |
| SOFA (mean (SD)) | 6.16 (3.48) | 6.56 (3.39) | 0.023 |
| CRRT (%) |  |  | 0.356 |
| NO | 20266 ( 93.2) | 395 ( 94.5) |  |
| YES | 1471 ( 6.8) | 23 ( 5.5) |  |
| BE (mean (SD)) | -1.60 (3.77) | -1.61 (3.73) | 0.971 |
| Oxygenation (mean (SD)) | 265.18 (107.12) | 273.12 (121.15) | 0.355 |
| Pco2 (mean (SD)) | 41.49 (10.00) | 39.89 (9.52) | 0.029 |
| Po2 (mean (SD)) | 180.54 (84.62) | 165.49 (82.48) | 0.016 |
| Ph (mean (SD)) | 7.36 (0.08) | 7.38 (0.08) | 0.002 |
| Lactate (mean (SD)) | 2.02 (0.95) | 2.10 (0.92) | 0.338 |
| Bilirubin (mean (SD)) | 2.13 (4.75) | 2.97 (4.63) | 0.001 |
| AST (mean (SD)) | 58.24 (50.46) | 66.03 (50.12) | 0.006 |
| ALT (mean (SD)) | 36.98 (31.44) | 36.56 (28.14) | 0.813 |
| APTT (mean (SD)) | 38.19 (18.32) | 37.50 (16.01) | 0.452 |
| PT (mean (SD)) | 14.55 (2.60) | 15.72 (2.90) | <0.001 |
| INR (mean (SD)) | 1.33 (0.25) | 1.44 (0.28) | <0.001 |
| Potassium (mean (SD)) | 4.29 (0.64) | 4.30 (0.64) | 0.719 |
| Creatinine (mean (SD)) | 1.57 (1.56) | 1.50 (1.54) | 0.372 |
| Chloride (mean (SD)) | 104.03 (6.44) | 103.46 (6.63) | 0.073 |
| Calcium (mean (SD)) | 8.24 (0.80) | 8.13 (0.74) | 0.004 |
| Bun (mean (SD)) | 23.85 (13.82) | 26.53 (14.36) | <0.001 |
| Aniongap (mean (SD)) | 14.12 (3.49) | 13.92 (3.48) | 0.254 |
| Albumin (mean (SD)) | 3.11 (0.67) | 2.99 (0.60) | 0.003 |
| wBC (mean (SD)) | 12.39 (5.23) | 10.69 (5.16) | <0.001 |
| PLT (mean (SD)) | 185.89 (83.77) | 147.28 (87.93) | <0.001 |
| Hb (mean (SD)) | 10.63 (2.04) | 9.47 (1.83) | <0.001 |
| Urine (mean (SD)) | 1634.65 (988.33) | 1521.08 (927.70) | 0.024 |
| Glucose (mean (SD)) | 136.11 (33.59) | 135.76 (32.26) | 0.84 |
| SPO2 (mean (SD)) | 96.96 (2.18) | 97.30 (1.72) | 0.002 |
| RR (mean (SD)) | 19.83 (4.16) | 18.46 (3.68) | <0.001 |
| MAP (mean (SD)) | 76.66 (9.87) | 75.83 (9.20) | 0.087 |
| HR (mean (SD)) | 87.16 (16.25) | 86.53 (16.41) | 0.436 |
| GCS (mean (SD)) | 13.16 (3.20) | 13.73 (2.65) | <0.001 |
| Weight (mean (SD)) | 80.39 (19.74) | 80.54 (19.50) | 0.876 |
| Gender (%) |  |  | 0.176 |
| F | 9115 ( 41.9) | 161 ( 38.5) |  |
| M | 12622 ( 58.1) | 257 ( 61.5) |  |
| Age (mean (SD)) | 64.99 (16.30) | 60.45 (13.72) | <0.001 |
| charlson (mean (SD)) | 5.17 (2.99) | 5.71 (2.70) | <0.001 |

**sTable.3: Baseline characteristics of the IPTW cohort**

| **Variables** | **NO-Sucralfate** | **Sucralfate** | **P Value** | **SMD** |
| --- | --- | --- | --- | --- |
|
| 22153.73 | 27749.61 |
| ICU mortality |  |  | <0.001 | 0.279 |
| NO | 19615.1 (88.5) | 26620.3 (95.9) |  |  |
| YES | 2538.6 (11.5) | 1129.3 ( 4.1) |  |  |
| Hospital mortality |  |  | 0.045 | 0.212 |
| NO | 18494.8 (83.5) | 25133.5 (90.6) |  |  |
| YES | 3658.9 (16.5) | 2616.1 ( 9.4) |  |  |
| Ventilation (%) |  |  | 0.855 | 0.019 |
| NO | 12632.3 (57.0) | 16083.2 (58.0) |  |  |
| YES | 9521.5 (43.0) | 11666.4 (42.0) |  |  |
| Vasoactive (%) |  |  |  |  |
| NO | 11014.6 (49.7) | 12985.1 (46.8) | 0.559 | 0.059 |
| YES | 11139.2 (50.3) | 14764.5 (53.2) |  |  |
| SOFA (mean (SD)) | 6.17 (3.49) | 6.43 (3.38) | 0.413 | 0.075 |
| CRRT (%) |  |  |  |  |
| NO | 20659.3 (93.3) | 24204.9 (87.2) | 0.131 | 0.204 |
| YES | 1494.4 ( 6.7) | 3544.8 (12.8) |  |  |
| Oxygenation (mean (SD)) | 262.01 (87.35) | 248.29 (82.09) | 0.06 | 0.162 |
| Pco2 (mean (SD)) | 41.57 (8.49) | 41.78 (8.47) | 0.85 | 0.025 |
| Po2 (mean (SD)) | 175.25 (72.54) | 165.25 (66.85) | 0.157 | 0.143 |
| Ph (mean (SD)) | 7.36 (0.07) | 7.36 (0.06) | 0.806 | 0.022 |
| Lactate (mean (SD)) | 1.96 (0.78) | 1.93 (0.79) | 0.78 | 0.032 |
| Bilirubin (mean (SD)) | 1.68 (3.86) | 1.59 (3.82) | 0.728 | 0.023 |
| AST (mean (SD)) | 54.68 (40.24) | 57.74 (45.75) | 0.526 | 0.071 |
| ALT (mean (SD)) | 35.05 (24.76) | 34.77 (25.50) | 0.898 | 0.011 |
| APTT (mean (SD)) | 38.12 (17.83) | 42.81 (21.21) | 0.144 | 0.239 |
| INR (mean (SD)) | 1.33 (0.24) | 1.31 (0.21) | 0.308 | 0.073 |
| Potassium (mean (SD)) | 4.29 (0.64) | 4.39 (0.64) | 0.204 | 0.151 |
| Creatinine (mean (SD)) | 1.57 (1.55) | 2.62 (3.17) | 0.025 | 0.42 |
| Chloride (mean (SD)) | 104.02 (6.44) | 102.57 (7.09) | 0.063 | 0.214 |
| Calcium (mean (SD)) | 8.25 (0.77) | 8.31 (0.81) | 0.475 | 0.074 |
| Bun (mean (SD)) | 24.66 (13.80) | 27.52 (14.22) | 0.091 | 0.204 |
| Aniongap (mean (SD)) | 14.15 (3.46) | 15.03 (3.55) | 0.008 | 0.251 |
| Albumin (mean (SD)) | 3.22 (0.55) | 3.22 (0.56) | 0.934 | 0.008 |
| wBC (mean (SD)) | 12.37 (5.14) | 13.60 (5.31) | 0.025 | 0.236 |
| PLT (mean (SD)) | 186.67 (82.92) | 197.21 (86.29) | 0.22 | 0.125 |
| Hb (mean (SD)) | 10.61 (2.05) | 10.89 (2.10) | 0.178 | 0.136 |
| Urine (mean (SD)) | 1634.56 (970.35) | 1459.88 (989.73) | 0.104 | 0.178 |
| Glucose (mean (SD)) | 136.69 (32.78) | 132.38 (28.83) | 0.08 | 0.139 |
| SPO2 (mean (SD)) | 96.97 (2.18) | 96.55 (1.94) | 0.038 | 0.202 |
| RR (mean (SD)) | 19.80 (4.15) | 20.82 (4.80) | 0.076 | 0.227 |
| MAP (mean (SD)) | 76.65 (9.86) | 75.82 (10.38) | 0.534 | 0.082 |
| HR (mean (SD)) | 87.15 (16.25) | 88.34 (16.34) | 0.479 | 0.073 |
| GCS (mean (SD)) | 13.17 (3.19) | 12.72 (3.84) | 0.436 | 0.128 |
| Weight (mean (SD)) | 80.64 (19.41) | 79.89 (20.11) | 0.692 | 0.038 |
| Gender (%) |  |  | 0.605 | 0.05 |
| F | 9289.8 (41.9) | 10957.4 (39.5) |  |  |
| M | 12863.9 (58.1) | 16792.2 (60.5) |  |  |
| Age (mean (SD)) | 64.91 (16.32) | 66.17 (13.99) | 0.407 | 0.083 |
| charlson (mean (SD)) | 5.18 (3.00) | 5.63 (3.03) | 0.271 | 0.149 |

**sTable.4: The stratified analysis results of the sepsis patients with and without PPI use.**

| Cohort | OR(95%CI) | P value | Adjusted OR | P value |
| --- | --- | --- | --- | --- |
| With PPI use | 0.37(0.23-0.58) | <0.001 | 0.55(0.32-0.89) | 0.009 |
| Without PPI use | 0.15(0.01-0.69) | 0.06 | 0.10(0.05-0.53) | 0.031 |

**sFig 2. Demographic and clinical feature selection using the least absolute shrinkage and selection operator (LASSO) binary logistic regression model.**

**
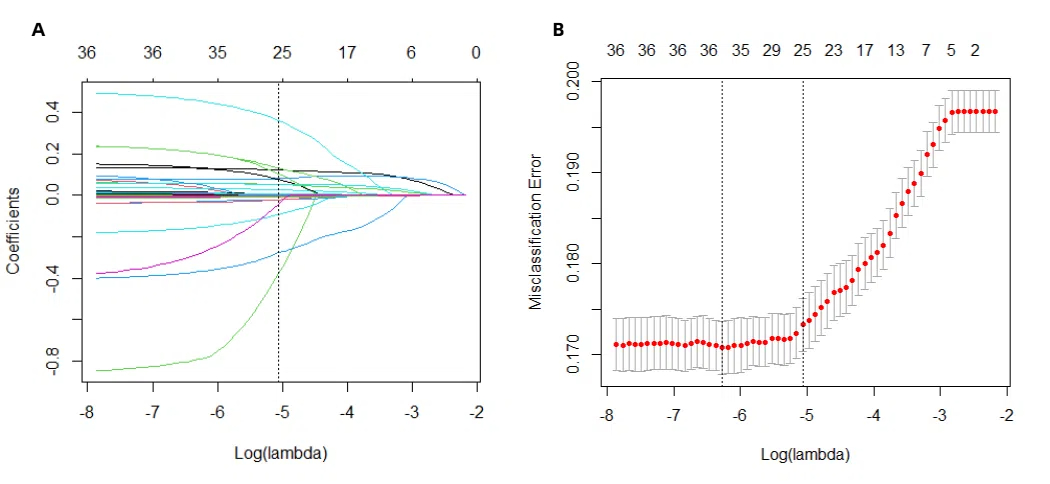
**

(A) Tuning parameter (λ) selection in the LASSO model used 10-fold cross-validation via minimum criteria. The partial likelihood deviance (binomial deviance) curve was plotted versus log(λ). Dotted vertical lines were drawn at the optimal values by using the one SE of the minimum criteria. λ value of 0.006 was chosen according to 10-fold cross-validation. (B) LASSO coefficient profiles of the 38 features. A coefficient profile plot was produced against the log (λ) sequence. The vertical line was drawn at the value selected using 10-fold cross-validation, where optimal resulted in 25 features with non-zero coefficients.
